# Supplementary material for: Hydrangenol Isolated from the Leaves of Hydrangea serrata Attenuates Wrinkle Formation and Repairs Skin Moisture in UVB-Irradiated Hairless Mice
Source: PubMed Central journal article supplement (PMC6835603; doi:10.3390/nu11102354), 2019-10-02
Supplement: nutrients-11-02354-s001.pdf [file nutrients-11-02354-s001.pdf]

**Table S1.** The primer sequences for qRT-PCR

| <b>Gene</b>                     | <b>Forward sequence</b>              | <b>Reverse sequence</b>           |
|---------------------------------|--------------------------------------|-----------------------------------|
| <b>HYAL1</b>                    | 5' TACACAGCATGCTCAGAAAG 3'           | 5' AGTGTCTCCATTCCAAACAG 3'        |
| <b>HYAL2</b>                    | 5' AATCTGTGGAACGCTACATC 3'           | 5' GCCTGCTTCATTACTCTGTC 3'        |
| <b>Involucrin</b>               | 5' GGGTCAGTCACTTAAGCAAG 3'           | 5' CTACTTCTCCTGCTGTGTCC 3'        |
| <b>Filaggrin</b>                | 5' CTCAGGAGGAAGAGGACAGT 3'           | 5' CAAGGTGCTTTGCTGTAAAT 3'        |
| <b>COL1A1</b>                   | 5' CCCAGAACATCACCTATCAC 3'           | 5' GAGGTCTTGGTGGTTTTGTA 3'        |
| <b>MMP-1</b>                    | 5' TTGCCCAGAGAAAAGCTTCAG 3'          | 5' TAGCAGCCCAGAGAAGCAACA 3'       |
| <b>MMP-3</b>                    | 5' GTTCTGGGCTATACGAGGGC 3'           | 5' GGCAGCATCGATCTTCTTCA 3'        |
| <b>COX-2</b>                    | 5' TGCTGTACAAGCAGTGGCAA 3'           | 5' GCAGCCATTTCCTTCTCTCC 3'        |
| <b>IL-6</b>                     | 5'<br>GAGGATACTCACTCCCAACAGACC<br>3' | 5' AAGTGCATCATCGTTGTTCATACA<br>3' |
| <b>NQO-1</b>                    | 5' TGGCCGATTCAGAGTGGCAT 3'           | 5' AAACAGGCTGCTTGGAGCAAAA<br>3'   |
| <b>GCLM</b>                     | 5' GGGAACCTGCTCAACTGGGG 3'           | 5' CTGCATGGGCATGGTGCATT 3'        |
| <b>GCLC</b>                     | 5' TCCGGCATCGGAGAGGAGA 3'            | 5' AGCAGTTGCCCATCCCGAAT 3'        |
| <b><math>\beta</math>-actin</b> | 5' ATCACTATTGGCAACGAGCG 3'           | 5' TCAGCAATGCCTGGGTACAT 3'        |

**Figure S1.**

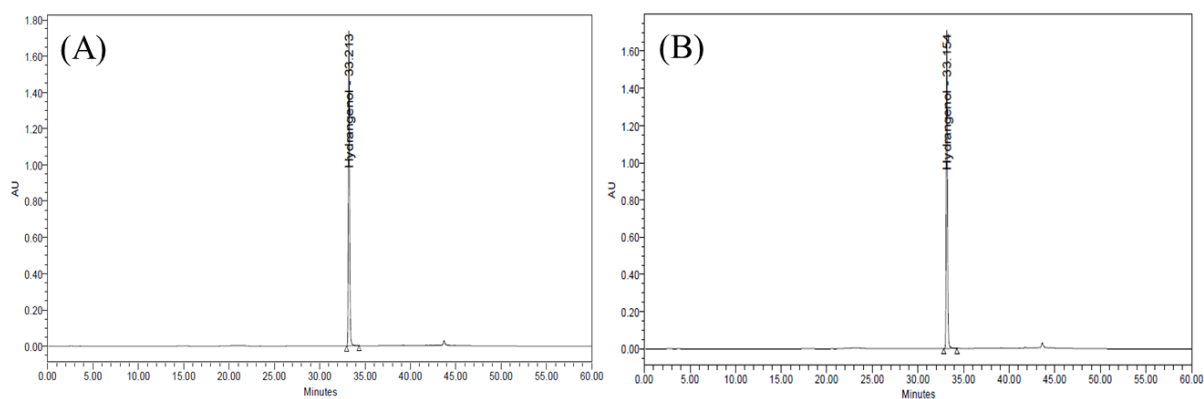

<HPLC analysis conditions>

- Column : Luna C18 (5  $\mu$ m, 250  $\times$  4.6 mm, Phenomenex)
- Detector : Waters 2489 UV/Vis Detector (228 nm)
- Pump : Waters e2695
- Oven temperature : 30°C
- Injection volume : 20  $\mu$ L
- Flow rate : 1 mL/min
- Solvent system : Gradient system (linear gradient system)

| Time (min)     | % A (ACN) | % B (H <sub>2</sub> O) |
|----------------|-----------|------------------------|
| <b>Initial</b> | 20        | 80                     |
| <b>15</b>      | 25        | 75                     |
| <b>30</b>      | 50        | 50                     |
| <b>40</b>      | 100       | 0                      |
| <b>50</b>      | 20        | 80                     |

**Figure S1.** (A) HPLC profile of hydrangenol isolated from WHS and (B) authentic reference hydrangenol

**Figure S2.**

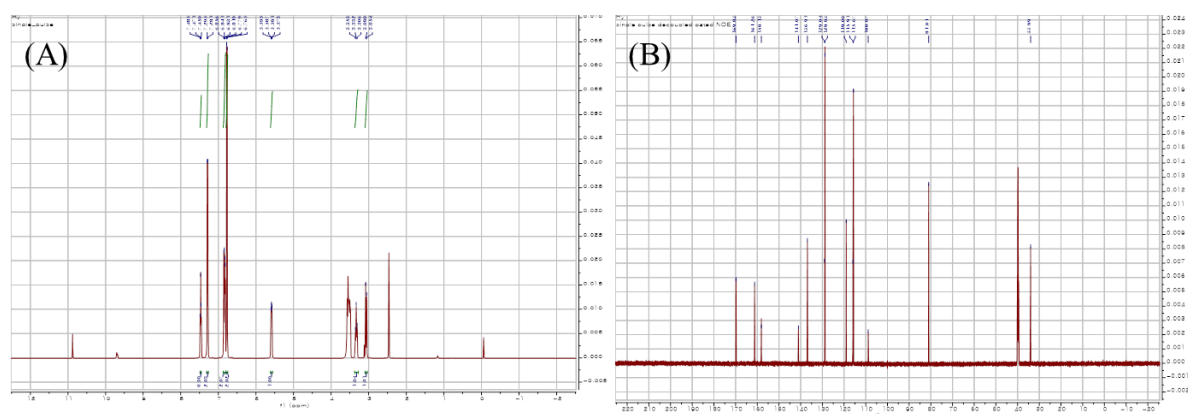

<sup>1</sup>H-NMR (600 MHz, DMSO-*d*<sub>6</sub>-D<sub>2</sub>O)  
δ: 7.47 (1H, dd, *J* = 7.2, 8.4 Hz, H-6), 7.29 (2H, d, *J* = 8.4 Hz, H-2',6'), 6.85 (1H, d, *J* = 8.4 Hz, H-7), 6.83 (1H, d, *J* = 7.2 Hz, H-5), 6.77 (2H, d, *J* = 8.4 Hz, H-3',5'), 5.50 (1H, dd, *J* = 3.6, 12.0 Hz, H-3), 3.33 (1H, dd, *J* = 12.0, 15.6 Hz, H-4a), 3.07 (1H, dd, *J* = 3.6, 15.6 Hz, H-4b).

<sup>13</sup>C-NMR (125 MHz, DMSO-*d*<sub>6</sub>-D<sub>2</sub>O)  
δ: 34.0 (C-4), 81.0 (C-3), 108.9 (C-9), 115.7 (C-3',5'), 115.9 (C-7), 119.0 (C-5), 128.8 (C-2',6'), 129.0 (C-1'), 136.9 (C-6), 141.1 (C-10), 158.1 (C-4'), 161.3 (C-8), 169.8 (C-1).

**Figure S2.** (A) <sup>1</sup>H and (B) <sup>13</sup>C NMR spectra of hydrangenol isolated from WHS measured in DMSO-*d*<sub>6</sub>-H<sub>2</sub>O. The chemical structure of hydrangenol was elucidated by instrumental analyses. 1D-NMR experiments were conducted using (A) <sup>1</sup>H-(600 MHz) and (B) <sup>13</sup>C-NMR (150 MHz), and recorded with VNS (JEOL, Tokyo, Japan).
